# Supplementary material
Source: MDPI journal article supplement (https://www.mdpi.com/2073-4441/13/13/1854)
Supplement: s1 [file s1]

Supplementary Table S2. Interpretable axes from principal components analysis of vegetation characteristics and percentage of overall variance (% of variance) and cumulative percentage of variance (Cum. % of variance) explained by the axes. Minimum (Min.), average (Avg.), and maximum (Max.) eigenvalues from 999 randomizations are shown, along with the resulting p-values.

| Axis | Eigen-<br>value | % of<br>variance | Cum. % of<br>variance | Min. | Avg. | Max. | P-value |
|------|-----------------|------------------|-----------------------|------|------|------|---------|
| 1    | 3.62            | 51.7             | 51.7                  | 1.21 | 1.47 | 1.96 | 0.001   |
| 2    | 1.76            | 25.1             | 76.8                  | 1.08 | 1.26 | 1.53 | 0.001   |
