# Supplementary material
Source: MDPI journal article supplement (https://www.mdpi.com/2073-4441/13/13/1854)
Supplement: s1 [file s1]

Supplementary Table S1. Vegetation characteristics and crayfish burrow densities by site. Averages (SD) of vegetation and cover data from quadrats (or from transects, for trees) at each site and the average number of active and inactive burrow openings per m<sup>2</sup>. Standard deviations calculated from transect means. SWD = small woody debris; LWD = large woody debris; stand. water = standing water; herb\_ht = height of tallest herbaceous plant in quadrat; woody\_ht = height of tallest woody shrub in quadrat; trees <1.2 m = number of trees shorter than 1.2 m per m of transect length; trees >1.2 m = number of trees taller than 1.2 m per m of transect length.

| Site code | Treat-<br>ment | Grass/<br>forbs<br>(%) | Woody<br>plants<br>(%) | Leaf/<br>SWD<br>(%) | LWD<br>(%) | Bare<br>soil<br>(%) | Herb_ht<br>(cm) | Woody_ht<br>(cm) | Trees<br><1.2 m<br>(*m <sup>-1</sup> ) | Trees<br>>1.2 m<br>(*m <sup>-1</sup> ) | Active<br>burrow<br>(*m <sup>-2</sup> ) | Inactive<br>burrow<br>(*m <sup>-2</sup> ) |
|-----------|----------------|------------------------|------------------------|---------------------|------------|---------------------|-----------------|------------------|----------------------------------------|----------------------------------------|-----------------------------------------|-------------------------------------------|
| F1C       | M              | 84.1                   | 7.4                    | 0.4                 | 0.0        | 8.2                 | 83.1            | 25.0             | 0.084                                  | 0.006                                  | 1.70                                    | 0.57                                      |
|           |                | (6.98)                 | (5.63)                 | (0.69)              | (0.00)     | (3.62)              | (10.94)         | (9.78)           | (0.068)                                | (0.011)                                | (0.88)                                  | (0.25)                                    |
| G11NW     | M              | 90.3                   | 0.2                    | 2.1                 | 0.0        | 7.2                 | 31.4            | 4.6              | 0.000                                  | 0.000                                  | 2.31                                    | 1.26                                      |
|           |                | (6.03)                 | (0.34)                 | (3.44)              | (0.00)     | (5.62)              | (6.73)          | (6.39)           | (0.000)                                | (0.000)                                | (1.05)                                  | (0.72)                                    |
| O20       | M              | 95.2                   | 0.0                    | 0.0                 | 0.0        | 4.8                 | 33.1            | 0.0              | 0.000                                  | 0.001                                  | 0.83                                    | 0.47                                      |
|           |                | (6.13)                 | (0.00)                 | (0.00)              | (0.00)     | (6.13)              | (7.91)          | (0.00)           | (0.000)                                | (0.004)                                | (0.55)                                  | (0.36)                                    |
| G15S      | F              | 77.8                   | 13.6                   | 0.2                 | 0.1        | 8.6                 | 101.0           | 30.4             | 0.009                                  | 0.005                                  | 1.01                                    | 0.55                                      |
|           |                | (4.95)                 | (3.28)                 | (0.34)              | (0.27)     | (4.65)              | (6.31)          | (4.79)           | (0.011)                                | (0.004)                                | (0.55)                                  | (0.42)                                    |
| G5N       | F              | 93.0                   | 5.9                    | 0.2                 | 0.0        | 0.9                 | 90.4            | 18.3             | 0.004                                  | 0.001                                  | 2.57                                    | 0.59                                      |
|           |                | (3.84)                 | (2.58)                 | (0.54)              | (0.00)     | (1.31)              | (4.06)          | (6.31)           | (0.009)                                | (0.002)                                | (1.23)                                  | (0.40)                                    |
| G6N       | F              | 86.0                   | 7.6                    | 0.1                 | 0.0        | 6.4                 | 95.8            | 23.6             | 0.003                                  | 0.003                                  | 1.48                                    | 0.51                                      |
|           |                | (4.26)                 | (3.90)                 | (0.27)              | (0.00)     | (1.44)              | (3.91)          | (11.83)          | (0.005)                                | (0.004)                                | (0.53)                                  | (0.36)                                    |
| O10SW     | F              | 74.1                   | 12.8                   | 0.6                 | 0.4        | 12.1                | 80.9            | 34.0             | 0.027                                  | 0.005                                  | 0.57                                    | 0.57                                      |
|           |                | (13.65)                | (7.27)                 | (0.66)              | (0.81)     | (7.10)              | (10.08)         | (5.80)           | (0.034)                                | (0.005)                                | (0.35)                                  | (0.35)                                    |
| O16E      | F              | 83.0                   | 11.8                   | 0.2                 | 0.7        | 4.3                 | 84.9            | 36.9             | 0.019                                  | 0.008                                  | 0.81                                    | 0.79                                      |
|           |                | (5.02)                 | (3.95)                 | (0.34)              | (1.63)     | (2.49)              | (8.99)          | (2.33)           | (0.024)                                | (0.012)                                | (0.60)                                  | (0.47)                                    |
| G11SE     | I              | 42.7                   | 27.6                   | 22.6                | 0.2        | 6.7                 | 79.7            | 91.4             | 0.039                                  | 0.154                                  | 0.08                                    | 0.34                                      |
|           |                | (13.64)                | (12.48)                | (5.46)              | (0.34)     | (3.60)              | (19.25)         | (13.79)          | (0.053)                                | (0.060)                                | (0.10)                                  | (0.19)                                    |
| O5S       | I              | 18.7                   | 7.3                    | 63.2                | 0.6        | 10.4                | 18.2            | 70.3             | 0.000                                  | 0.123                                  | 0.91                                    | 1.05                                      |
|           |                | (4.17)                 | (2.83)                 | (9.54)              | (1.07)     | (7.64)              | (2.47)          | (17.70)          | (0.000)                                | (0.054)                                | (0.70)                                  | (1.33)                                    |
| O9W       | I              | 65.2                   | 23.1                   | 5.2                 | 0.0        | 6.4                 | 81.66           | 56.8             | 0.059                                  | 0.037                                  | 0.63                                    | 0.55                                      |
|           |                | (6.00)                 | (3.79)                 | (3.33)              | (0.00)     | (2.91)              | (9.25)          | (6.09)           | (0.047)                                | (0.055)                                | (0.30)                                  | (0.42)                                    |
| O19E      | I_M            | 66.6                   | 14.9                   | 4.7                 | 0.3        | 13.0                | 76.6            | 46.2             | 0.018                                  | 0.022                                  | 1.48                                    | 0.91                                      |
|           |                | (12.78)                | (9.65)                 | (5.50)              | (0.56)     | (2.56)              | (10.31)         | (20.27)          | (0.010)                                | (0.013)                                | (0.84)                                  | (0.88)                                    |
